# Supplementary material for: Clinical verification of plasma messenger RNA as novel noninvasive biomarker identified through bioinformatics analysis for lung cancer
Source: PubMed Central journal article supplement (PMC5546455; doi:10.18632/oncotarget.16701), 2017-03-30
Supplement: oncotarget-08-43978-s001.pdf [file oncotarget-08-43978-s001.pdf]

## Clinical verification of plasma messenger RNA as novel noninvasive biomarker identified through bioinformatics analysis for lung cancer

### SUPPLEMENTARY TABLE

Supplementary Table 1: Primers used and PCR conditions

| Primer  | Sequence                                      | Length of PCR product (bp) | Annealing temperature (°C) |
|---------|-----------------------------------------------|----------------------------|----------------------------|
| TOP2A   | ggtgtggaactagaaggcct<br>tctgttctcgtggaggac    | 194                        | 59                         |
| GPT2    | cagaggaggctacatggagg<br>ccttctctcggtgaattgc   | 173                        | 58.5                       |
| GINS2   | aatgcccagccctactaca<br>cctgctgtctcacaagctg    | 161                        | 59                         |
| HJURP   | ctgccaagagcgattcatc<br>gtaacgattcctccgtggc    | 189                        | 58.5                       |
| TK1     | aattgtggctgactggatg<br>agtggactgtctgctccc     | 191                        | 59                         |
| CDCA5   | agggcccatctcactactaa<br>gacagctggacctctacag   | 168                        | 59                         |
| AGER    | ctaccgagtccgtgtctacc<br>ttctcattaggcaccagggg  | 171                        | 59                         |
| FHL1    | gaagtgcaacaaggccatca<br>gtgatggggttcttgcattcc | 198                        | 59                         |
| CLDN18  | ccgaatgcaggcctatttc<br>gaggtcagtgatggtggc     | 181                        | 59                         |
| ADAMTS8 | agagcagcaaagagagagca<br>ggtttcagagccttgttgc   | 178                        | 58.5                       |
| ADH1B   | ttggctgtgattctcgact<br>ctgttgatgtccaccgcaa    | 164                        | 59                         |
| GPIHBP1 | ggatgaggtggaagaggagg<br>caatgagggtgtgcaggtc   | 152                        | 59                         |
